# Supplementary material
Source: Research Square preprint supplement (doi:10.21203/rs.3.rs-8858104/v1)

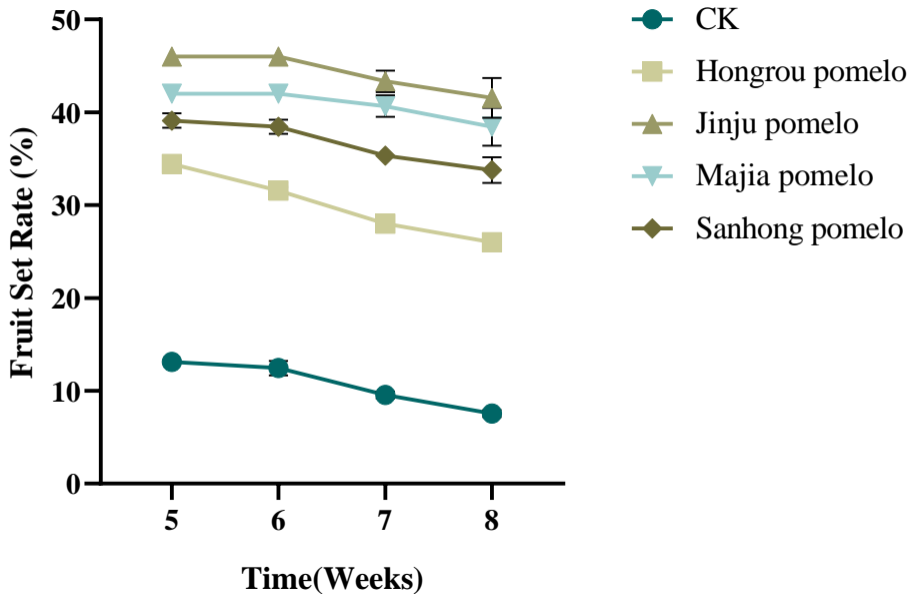

Supplement: Supplementary file 1 [file 240f131033720c1867a743cf.pdf]

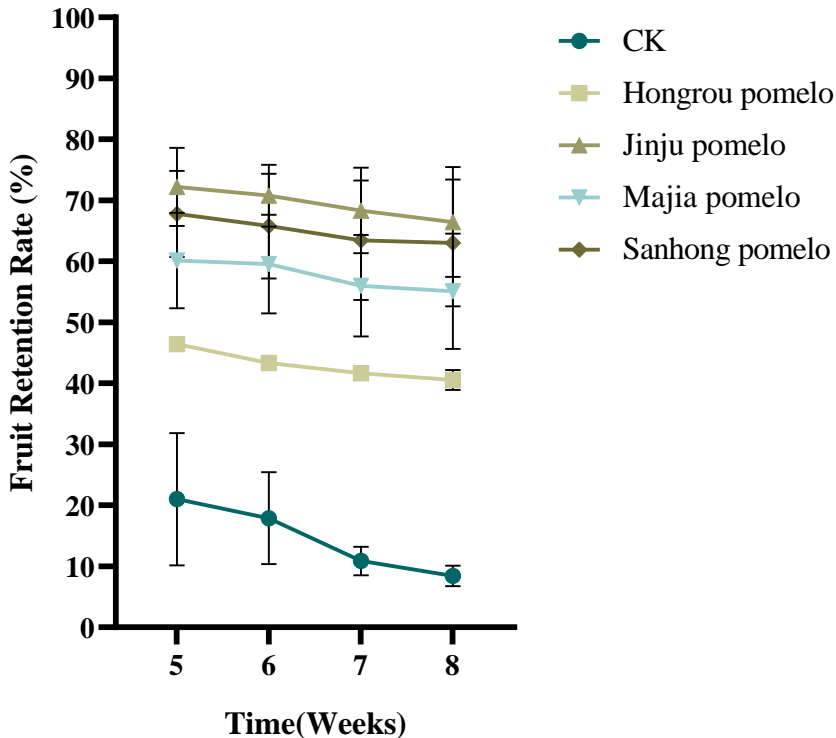

Supplement: Supplementary file 2 [file 9a63e500e3059f8f62bb4d49.pdf]
